# Supplementary material
Source: publisher figshare collection journal article supplement (https://frontiersin.figshare.com/ndownloader/files/24355985)
Supplement: Supplementary file [file 24355985]

Supplementary figure 1

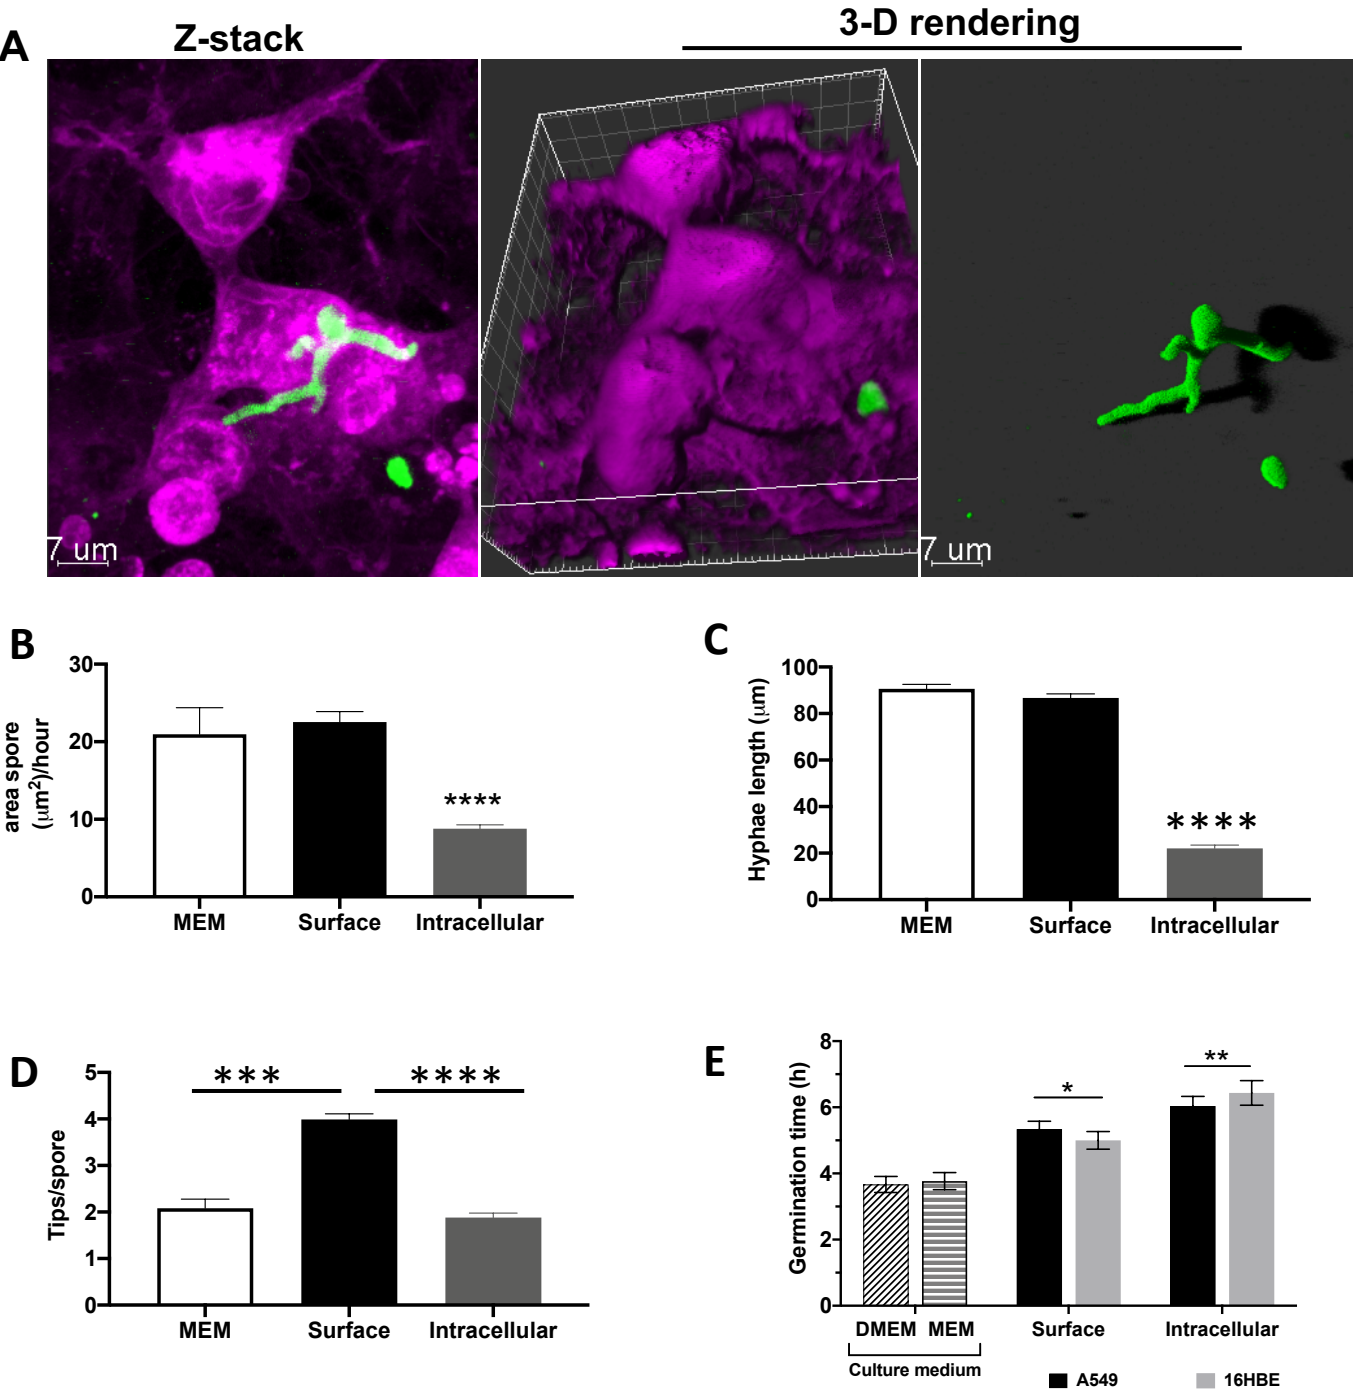

**FIGURE S1. Cellular morphogenesis of *A. fumigatus* upon infection of 16HBE bronchial epithelial cells.** (A) Live-cell imaging of 16HBE bronchial epithelial cells (magenta) infected with hyperbranched *A. fumigatus* expressing cytoplasmic GFP for 18 h at 37 °C, 5 % CO<sub>2</sub>. *A. fumigatus* (B) germination rate, (C) Hyphae extension and (D) Branching in the presence or absence of alveolar cells. Measurements were performed three biological and technical replicates (average ± standard deviation [SD]). \* *P* < 0.05; \*\* *P* < 0.01; \*\*\* *P* < 0.001; \*\*\*\* *P* < 0.0001. (B) germination rate

**A**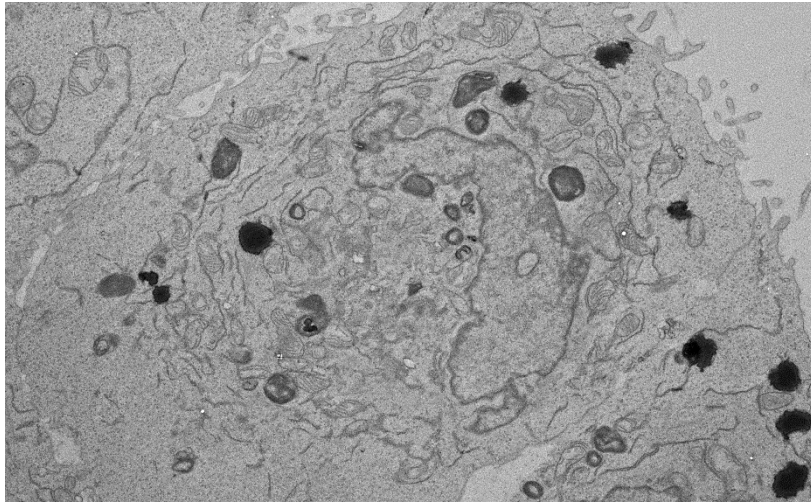**B**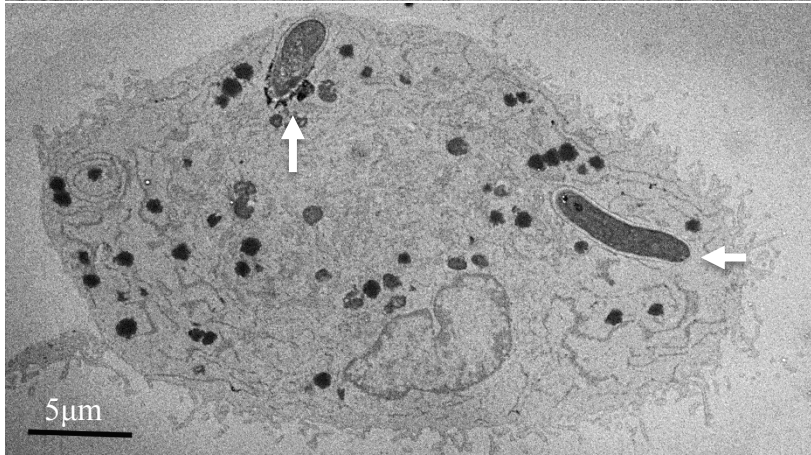

**FIGURE S2. Transmission electron micrographs of the cellular architecture of human alveolar cells.** Alveolar A549 monolayers were challenged with *A. fumigatus* for 18 h in DMEM at 37 °C, 5 % CO<sub>2</sub>. **(A)** An uninfected alveolar cell **(B)** An alveolar cell infected by *A. fumigatus* (white arrows). Note that the infected alveolar cell is the same as used in Fig. 4.



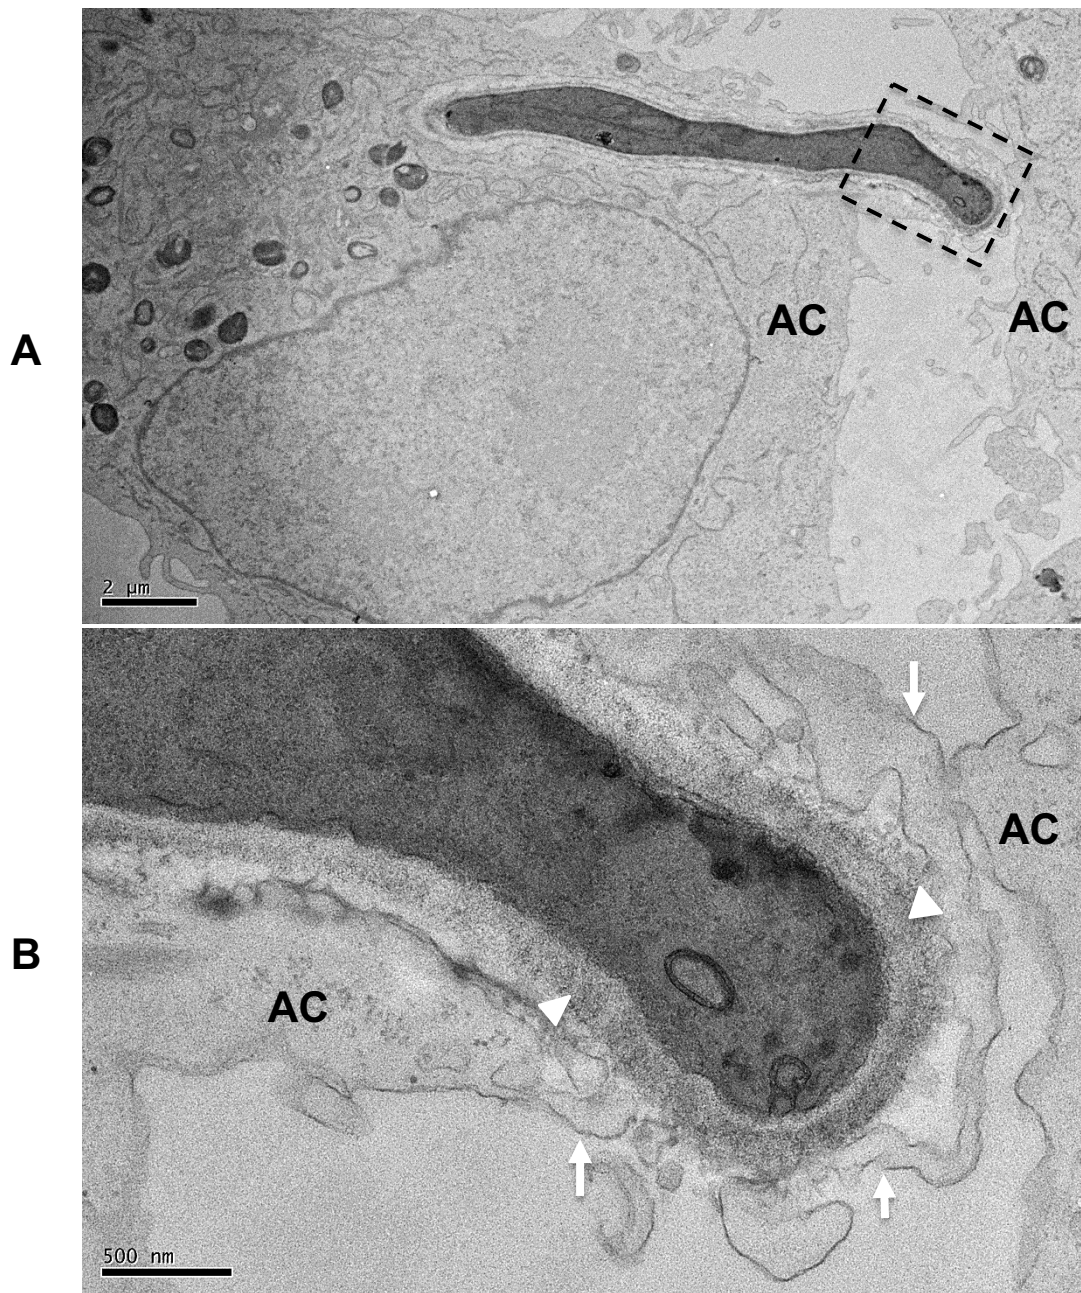

**FIGURE S3. Internalized hyphae of *A. fumigatus* cause the protrusion of the host plasma membrane upon escape.** Transmission electron micrographs of an internalized *A. fumigatus* germling escaping from a host alveolar cell. Nystatin treated alveolar A549 monolayers were challenged with *A. fumigatus* for 18 h in DMEM at 37 °C, 5 % CO<sub>2</sub>. **(A)** Low magnification of a escaping hypha. **(B)** Zoom in shown in A of the same escaping germling. Note the protrusion of host plasma membrane (white arrows) that covers the apical area of the *A. fumigatus* tip upon escape. Arrowheads highlight the cell wall of *A. fumigatus*. AC: alveolar cell.

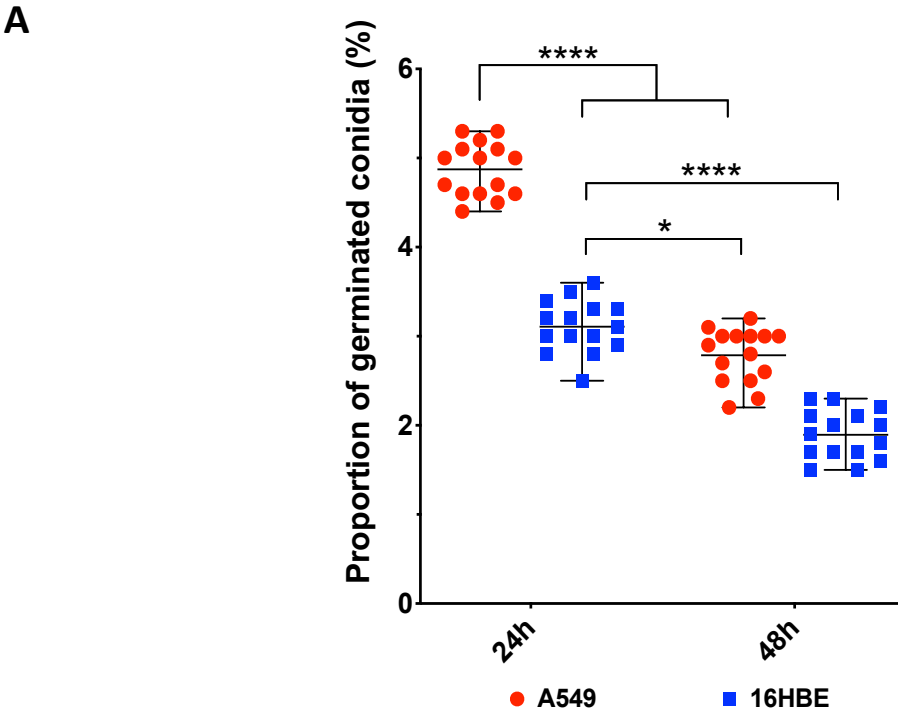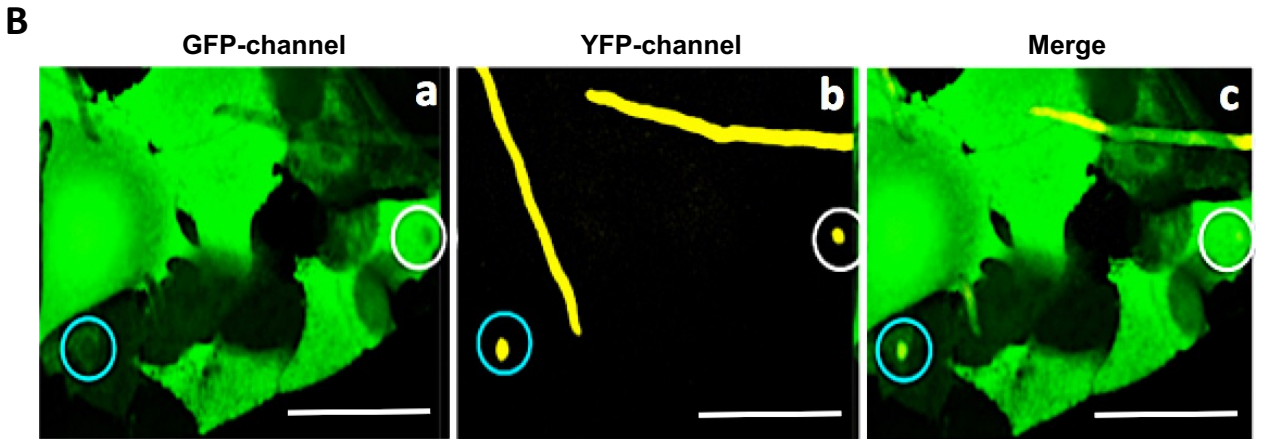

**FIGURE S4. Persistence of *A. fumigatus* conidia within A549 epithelial cells.** **A)** About 5% of *A. fumigatus* conidia remains latent within A549, which was significantly higher than in 16HBE (3.11%) 24 h post-challenge. Persistent conidia was reduced in both cell lines (2.79% and 1.89%). Differences were compared using two-way ANOVA (\* $P < 0.02$ , \*\*\*\* $P < 0.0001$ ). **B)** 3-D confocal Z-stack, **a)** cytosolic-GFP A549-epithelial cells (green), **b)** cytosolic-YFP (yellow) of *A. fumigatus* (gift from Sven Krappmann), and **c)** a merge of both channels. A small proportion of *A. fumigatus* internalized conidia had the ability to remain latent without germination for more than 48 h. (63x). Scale Bar = 40  $\mu\text{m}$ .

**A**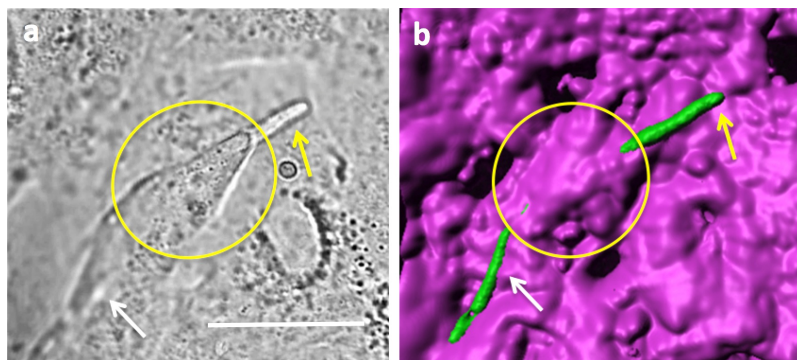**B**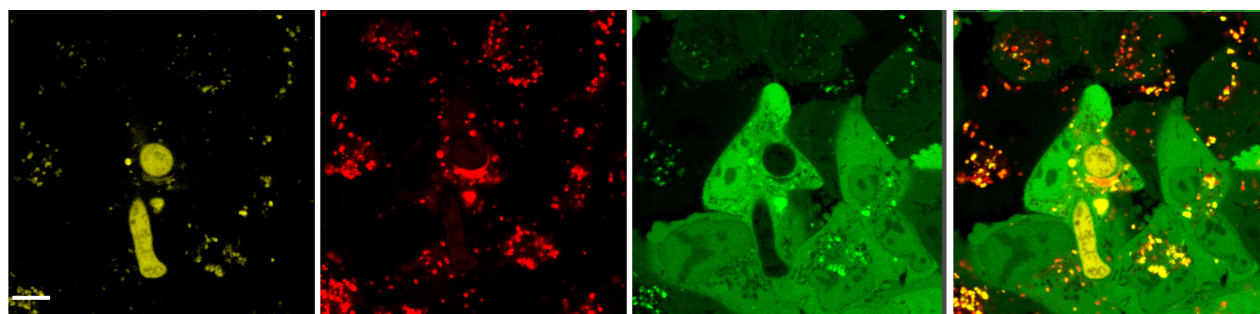

**A. *fumigatus***  
**YFP**

**LysoTracker**  
**(RFP)**

**Host (GFP)**

**Merged**

**FIGURE S5. A)** 3-D confocal image of a hypha (green) that has germinated within the epithelial cell (magenta) and emerged extracellularly (indicated by white arrow) and then penetrated the adjacent cell (indicated by a yellow circle) and exited again (indicated by a yellow arrow) 18 h post-inoculation. **B)** 3-D confocal stack demonstrate an *A. fumigatus* germling (yellow) were localized within GFP-cytosolic A549 cell (green) that germinated intracellularly and extended its hyphae to escape without causing epithelial cell damage. Red shows acidification failure during hyphae escape (63x). Scale Bar = 5  $\mu$ m.



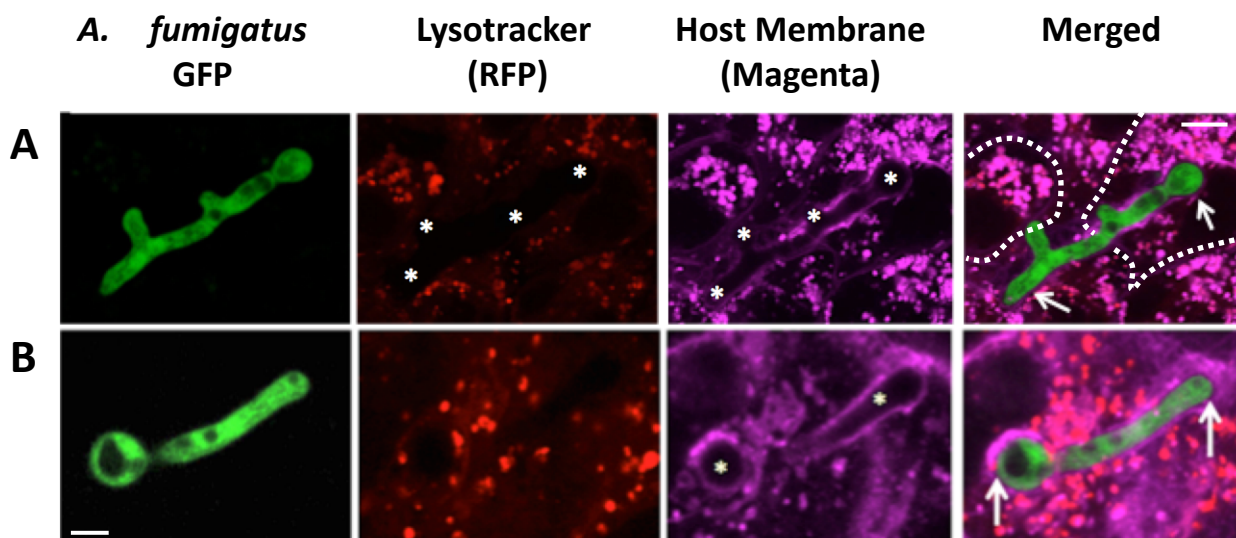

**Supplementary Figure 6: (A)** Germinated *A. fumigatus* spores within un-acidic phagosomes, which grow (arrows), started to branch, and invading the adjacent cells (dash). **(B)** Lack or reduction of phagosome acidification facilitated *A. fumigatus* conidia germination and growth 18h post-inoculation. Asterisk represent points of active growth. Asterisks represent fungal regions of active growth (63x) Scale Bar = 5  $\mu$ m.
